# Supplementary material for: Prognostic factors influencing clinical outcome of allogeneic hematopoietic stem cell transplantation following imatinib-based therapy in BCR–ABL-positive ALL
Source: PubMed Central journal article supplement — Blood Cancer J. 2012 May 18;2(5):e72–. doi: 10.1038/bcj.2012.18 (PMC3366071; doi:10.1038/bcj.2012.18), 2012-05-18
Supplement: bcj201218x1.pdf [file bcj201218x1.pdf]

A

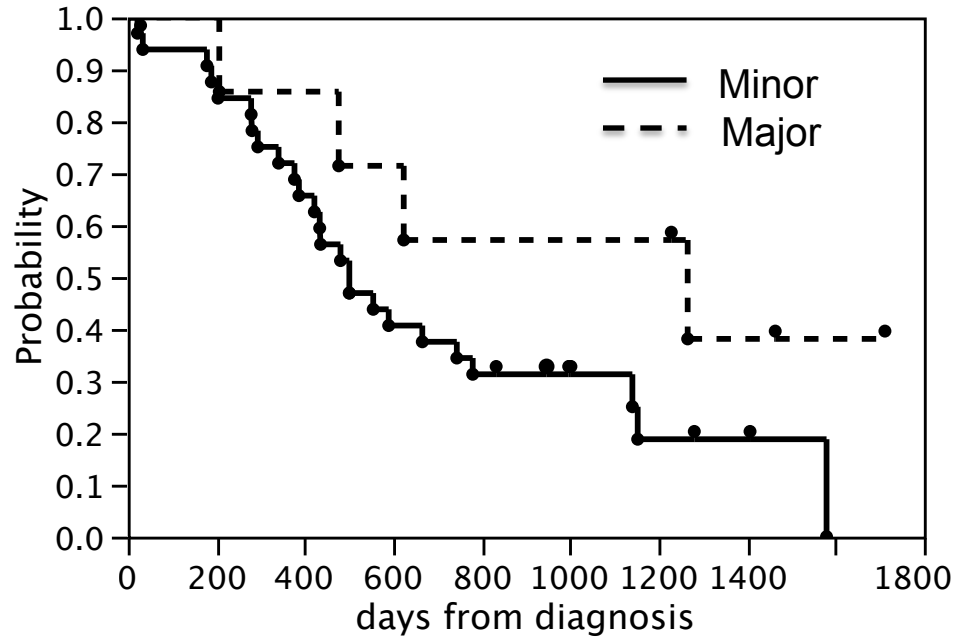

Supplemental data.

(A) OS from diagnosis by type of *BCR-ABL* transcripts in patients who did not receive HSCT in first CR. Major vs Minor group= 50% vs. 31% at 3 years,  $p=0.254$ .

B

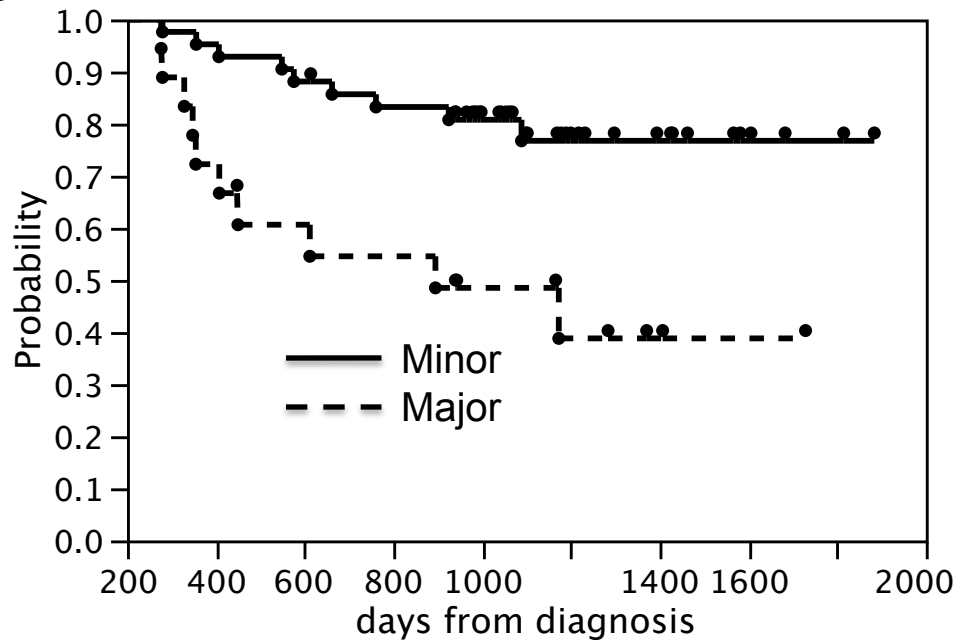

(B) OS from diagnosis by type of *BCR-ABL* transcripts in patients who received HSCT in first CR. Major vs. Minor group= 49% vs. 81% at 3 years,  $p=0.003$ .
